# Supplementary material
Source: HighWire-hosted journal article supplement (https://www.jneurosci.org/content/41/8/1665)
Supplement: inline-supplementary-material-2 [file inline-supplementary-material-2.docx]

**Figure 2-2.** CA3 cell types and data sources

| **Cell type** | **Code** | **Sources** | **Figure** |
| --- | --- | --- | --- |
| **Pyramidal cell** | 19 | Ishizuka et al. 1990  Spruston et al. 2007 | 1  7 |
| **Pyramidal-c cell** | 20 | Hajos et al. 2013 | 2A |
| **Granule cell** | 22 | Szabadics et al. 2010 | 2A1  6A |
| **Axo-Axonic cell** | 23 | Hajos et al. 2013 | 2A |
| **Horizontal Axo-Axonic cell** | 24 | Gulyas et al. 1993  Szabo et al. 2010 | 1D  1B |
| **Basket cell** | 25 | Hajos et al. 2013 | 2A |
| **Basket CCK+ cell** | 26 | Szabadics et al. 2009 | 3A |
| **Bistratified cell** | 27 | Szabo et al. 2014 | 4E |
| **IS-Oriens cell** | 28 | Hajos et al. 2004 | 6A1  6A2 |
| **Ivy cell** | 30 | Szabadics et al. 2010 | 4C  7A |
| **LMR-Targeting cell** | 31 | Anderson et al. 2011 | 1B |
| **Lucidum ORAX cell** | 33 | Spruston et al. 1997 | 1B  6B  8A |
| **Lucidum-Radiatum cell** | 34 | Spruston et al. 1997 | 1A  6A  6C |
| **Spiny-Lucidum cell** | 35 | Szabadics et al. 2009 | 5A  5D |
| **Mossy Fiber Associated cell** | 36 | Szabadics et al. 2009  Szabadics et al. 2010 | 6  7C |
| **Mossy Fiber Associated ORDEN cell** | 37 | Vida et al. 2000 | 1A |
| **O-LM cell** | 38 | Hajos et al. 2013 | 2A |
| **QuadD-LM cell** | 39 | Freund et al. 1996 | 11B |
| **Radiatum cell** | 40 | Hajos et al. 2004  Tricoire et al. 2011 | 5B  7J |
| **R-LM cell** | 41 | Hajos et al. 2004 | 5C |
| **SO-SO cell** | 42 | Hajos et al. 2013 | 2A |
| **Trilaminar cell** | 43 | Gloveli et al. 2005 | 2B  2D |
|  |  | Total | 35 |
